# Supplementary material for: Temporal variability of NO x emissions from power plants: a comparison of satellite- and inventory-based estimates
Source: Copernicus journal article supplement (doi:10.5194/egusphere-2025-6057), 2026-01-14
Supplement: Supplementary file 1 [file Additional tables and figures.pdf › supplement/Additional tables and figures.pdf]

# Additional tables and figures for “Temporal variability of NO<sub>x</sub> emissions from power plants”

Gerrit Kuhlmann et al. (gerrit.kuhlmann@empa.ch)

**Table S1.** Statistical analysis of emission time series for satellite overpass and monthly means.

| Power plant     | Satellite overpass times |                |                | Monthly means |                |                |
|-----------------|--------------------------|----------------|----------------|---------------|----------------|----------------|
|                 | MB [%]                   | $\chi^2_{red}$ | r <sup>2</sup> | MB [%]        | $\chi^2_{red}$ | r <sup>2</sup> |
| Belchatow       | -5                       | 4.9            | 0.12           | -6            | 1.6            | 0.01           |
| Boxberg         | 37                       | 9.2            | 0.23           | 37            | 2.7            | 0.46           |
| Kozienice       | 7                        | 20.1           | 0.13           | 68            | 4.0            | 0.10           |
| Jänschwalde     | 6                        | 7.5            | 0.29           | 5             | 1.5            | 0.30           |
| Lippendorf      | 41                       | 8.4            | 0.32           | 45            | 2.9            | 0.64           |
| Weisweiler      | 88                       | 18.7           | 0.00           | 78            | 3.8            | 0.24           |
| Alcoa Allowance | 30                       | 11.3           | 0.21           | 31            | 3.1            | 0.58           |
| Colstrip        | 28                       | 12.8           | 0.16           | 34            | 4.2            | 0.46           |
| Gen J M Gavin   | 63                       | 12.4           | 0.21           | 77            | 6.8            | 0.16           |
| Hunter          | 128                      | 29.5           | 0.07           | 144           | 11.5           | 0.13           |
| Intermountain   | 7                        | 18.2           | 0.35           | 8             | 3.5            | 0.55           |
| James H Miller  | 31                       | 18.7           | 0.01           | 31            | 3.5            | 0.05           |
| Labadie         | 7                        | 7.4            | 0.01           | 4             | 1.8            | 0.00           |
| Martin Lake     | 2                        | 8.6            | 0.05           | 13            | 2.1            | 0.13           |
| Miami Fort      | 50                       | 15.2           | 0.43           | 64            | 3.4            | 0.84           |
| Milton R Young  | 60                       | 18.1           | 0.03           | 66            | 8.4            | 0.05           |
| New Madrid      | 24                       | 10.6           | 0.41           | 27            | 3.7            | 0.51           |
| Thomas Hill     | 1                        | 12.0           | 0.40           | 8             | 2.0            | 0.84           |

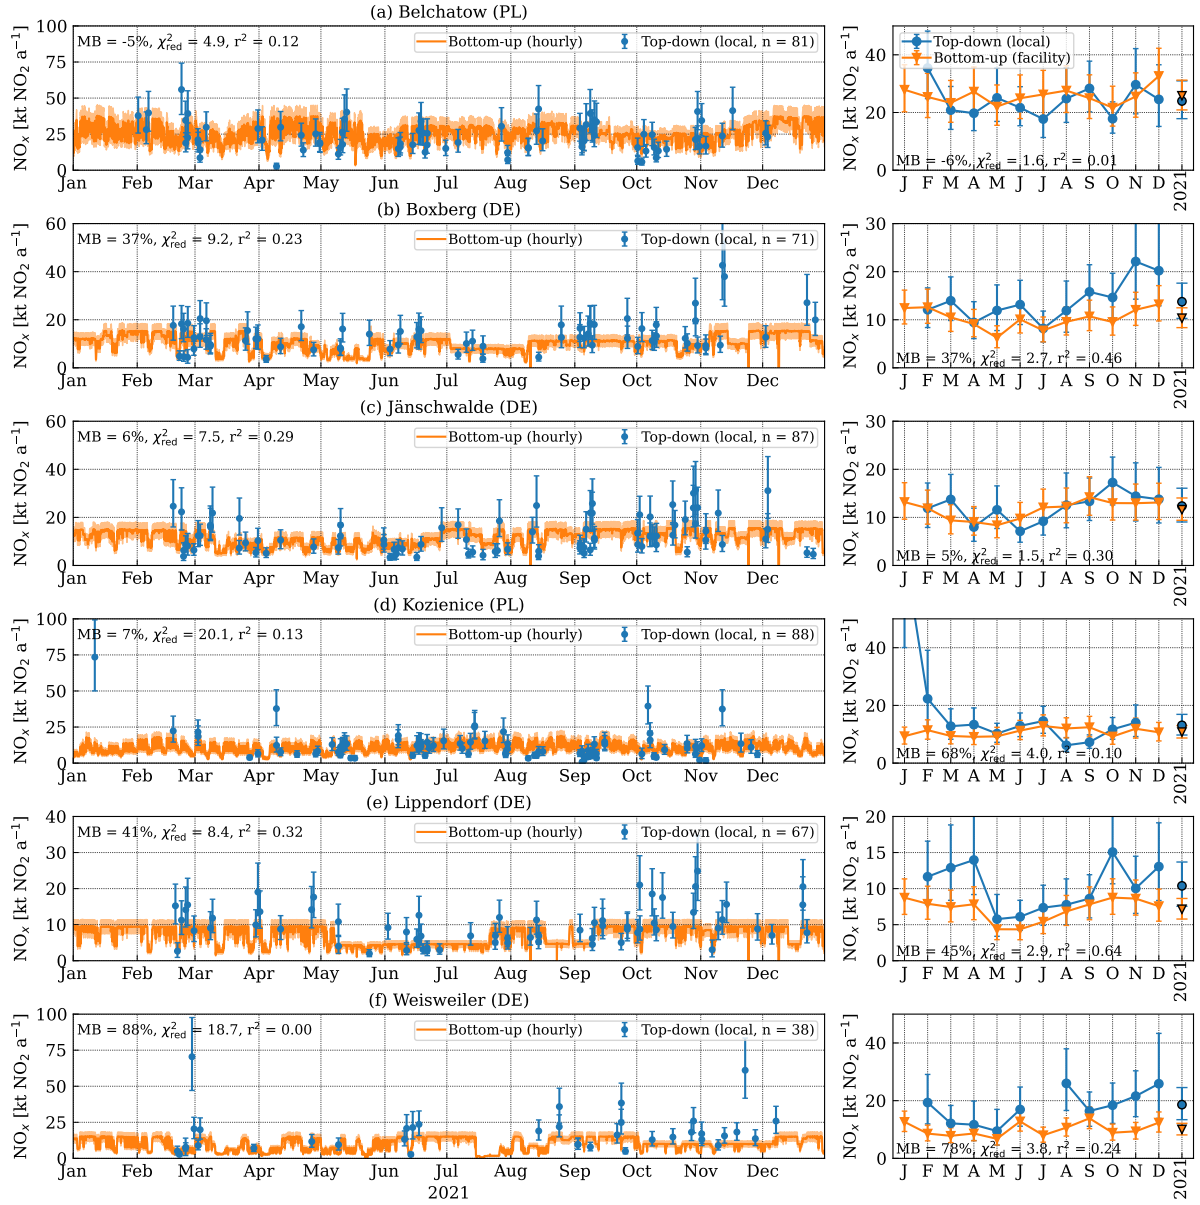

**Figure S1.** Time series of  $\text{NO}_x$  emission estimates from top-down (using the local  $\text{NO}_x$  correction approach) and bottom-up (based on reported values for the power plant). The left column shows individual satellite overpass estimates ( $n$  indicates the number of overpasses used), while the right column presents monthly averages. Error bars represent the  $1\sigma$  confidence interval derived from Monte Carlo simulations.

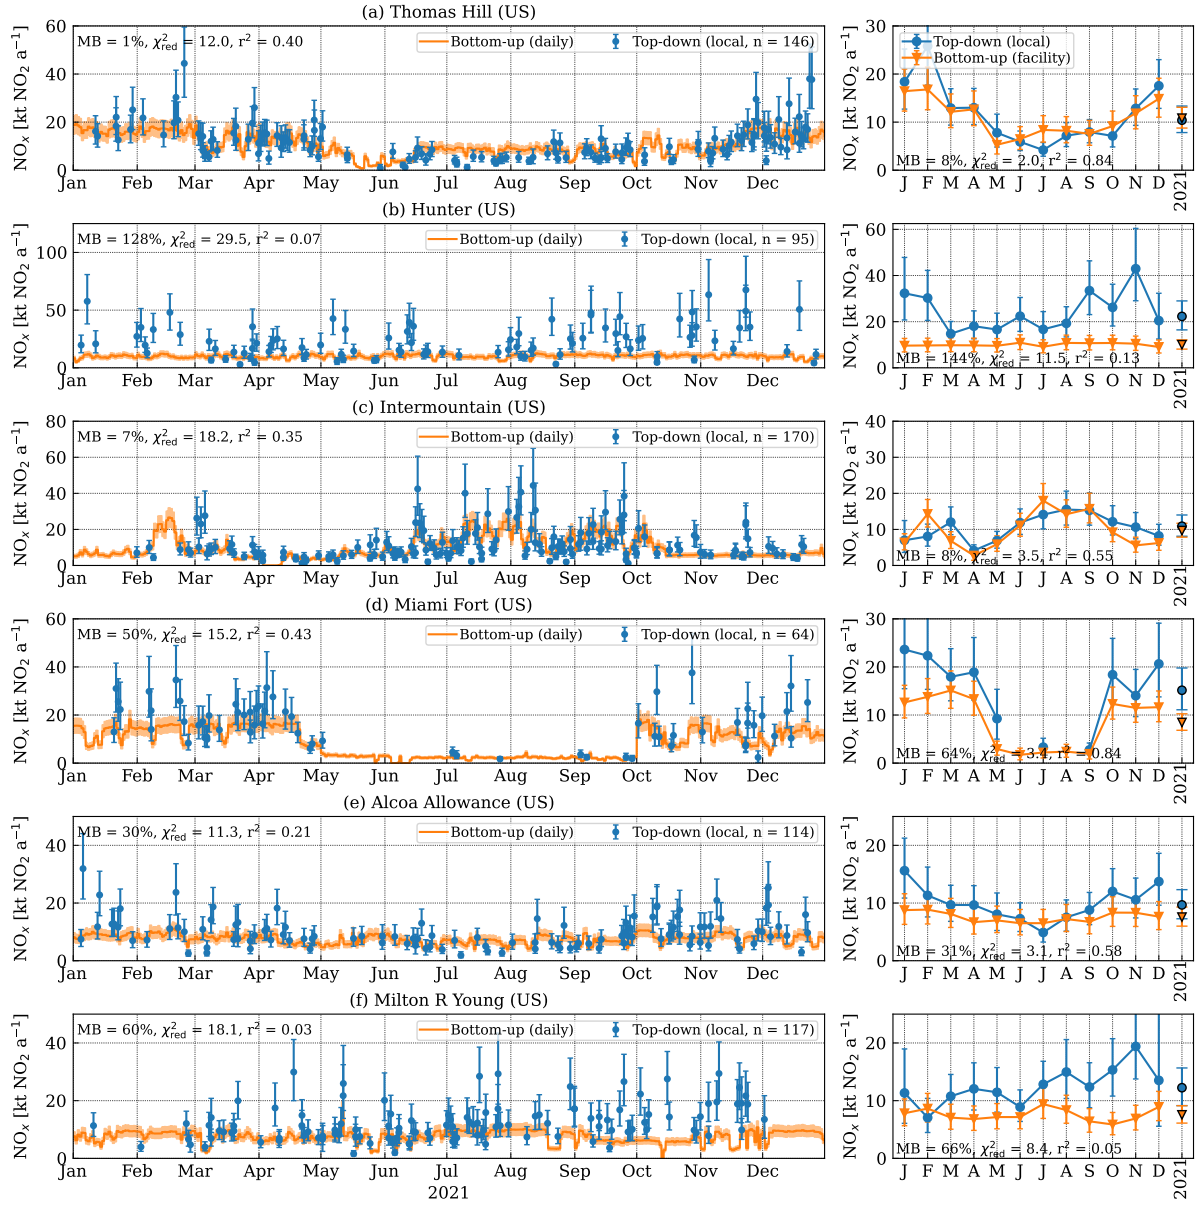

**Figure S2.** Time series of  $\text{NO}_x$  emission estimates from top-down (using the local  $\text{NO}_x$  correction approach) and bottom-up (based on reported values for the power plant). The left column shows individual satellite overpass estimates ( $n$  indicates the number of overpasses used), while the right column presents monthly averages. Error bars represent the  $1\sigma$  confidence interval derived from Monte Carlo simulations.

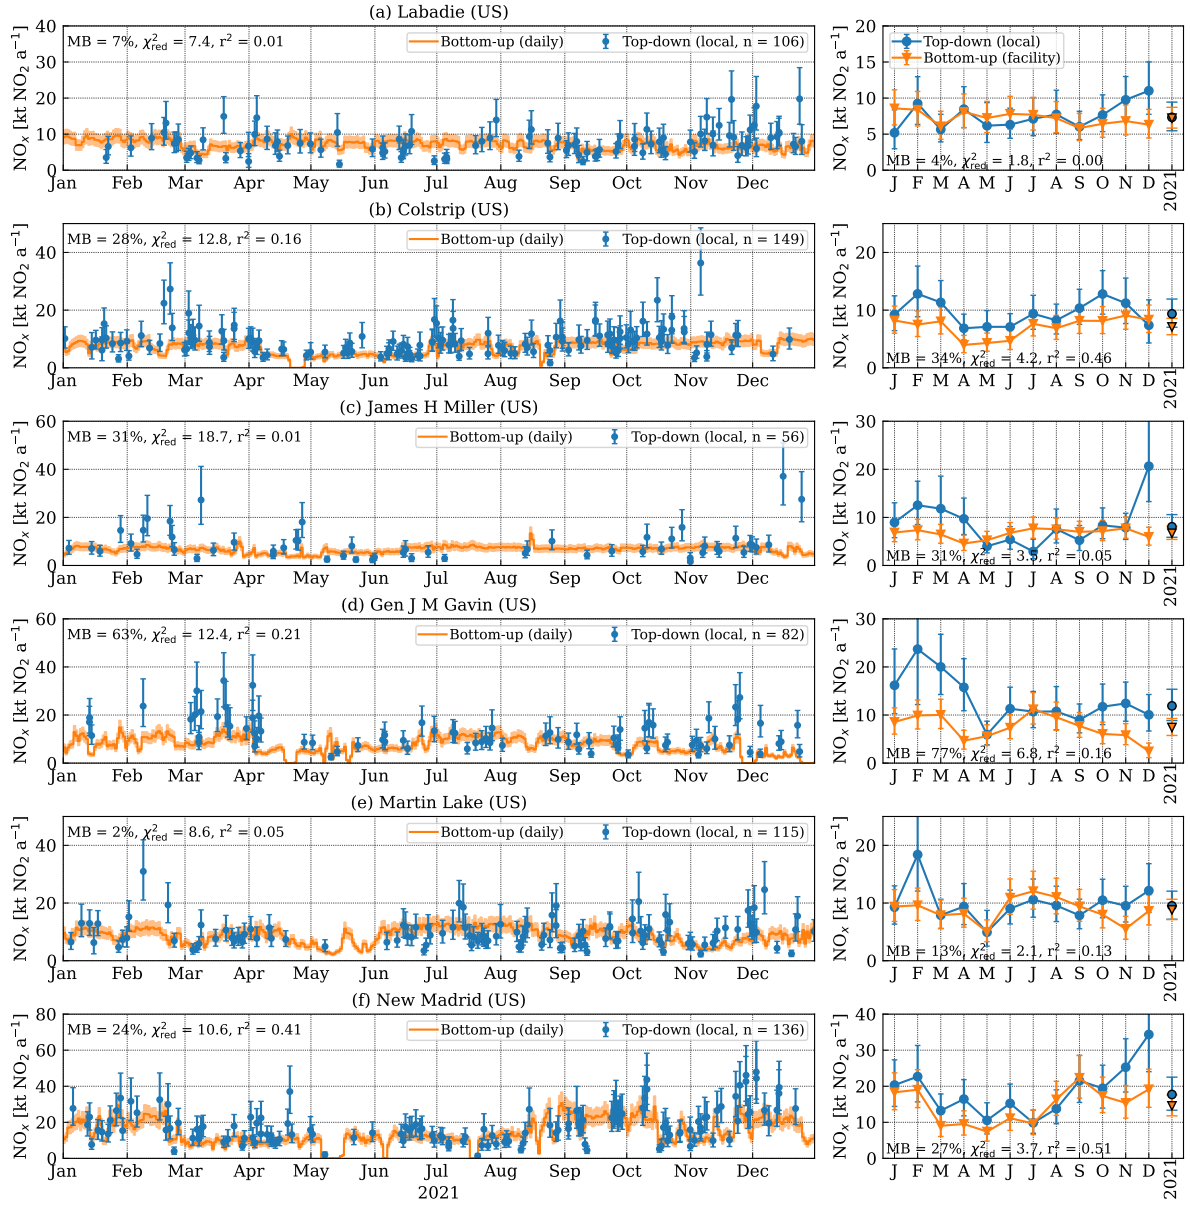

**Figure S3.** Time series of  $\text{NO}_x$  emission estimates from top-down (using the local  $\text{NO}_x$  correction approach) and bottom-up (based on reported values for the power plant). The left column shows individual satellite overpass estimates ( $n$  indicates the number of overpasses used), while the right column presents monthly averages. Error bars represent the  $1\sigma$  confidence interval derived from Monte Carlo simulations.

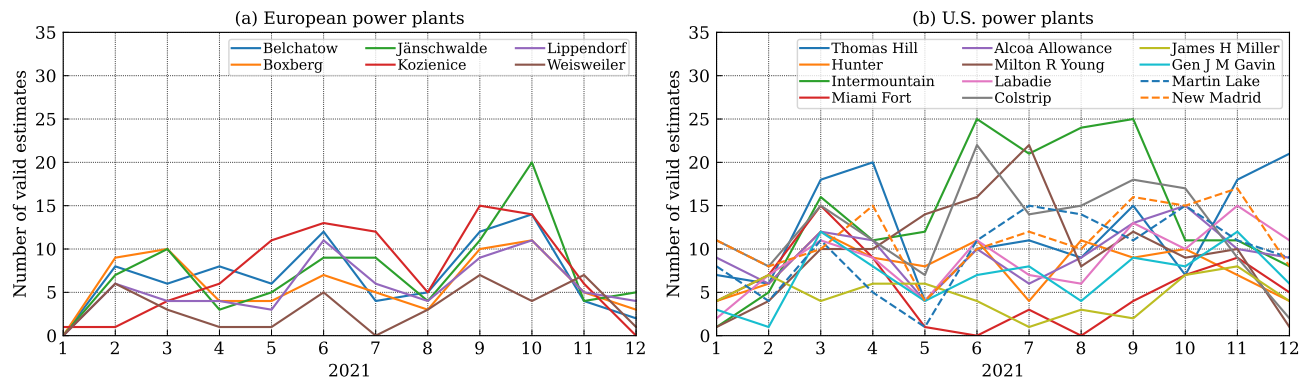

**Figure S4.** Number of valid top-down emission estimates per month and power plant in 2021.
